# Supplementary material for: Case report: Second report of neuromuscular syndrome caused by biallelic variants in ASCC3
Source: Front Genet. 2024 Sep 2;15:1382275. doi: 10.3389/fgene.2024.1382275 (PMC11402803; doi:10.3389/fgene.2024.1382275)
Supplement: Supplementary file 1 [file Table2.XLSX]

## Sheet: Sheet1
Genes associated with intellectual disability
Gene/Locus	Approved Symbol	Gene/Locus name	Gene/Locus MIM number	Phenotype	Phenotype MIM number	Inheritance
GNB1, MRD42, MDS	GNB1	Guanine nucleotide-binding protein, beta polypeptide-1	139380	Intellectual developmental disorder, autosomal dominant 42	616973	AD
GNB1, MRD42, MDS	GNB1	Guanine nucleotide-binding protein, beta polypeptide-1	139380	Leukemia, acute lymphoblastic, somatic	613065
GNB1, MRD42, MDS	GNB1	Guanine nucleotide-binding protein, beta polypeptide-1	139380	Myelodysplastic syndrome, somatic	614286
CEP104, GLYBP, KIAA0562, JBTS25, MRT77	CEP104	Centrosomal protein, 104kD	616690	Intellectual developmental disorder, autosomal recessive 77	619988	AR
CEP104, GLYBP, KIAA0562, JBTS25, MRT77	CEP104	Centrosomal protein, 104kD	616690	Joubert syndrome 25	616781	AR
SLC45A1, DNB5, IDDNPF	SLC45A1	Solute carrier family 45, member 1	605763	Intellectual developmental disorder with neuropsychiatric features	617532	AR
NMNAT1, NMNAT, PNAT1, LCA9, SHILCA	NMNAT1	Nicotinamide nucleotide adenylyltransferase 1	608700	Leber congenital amaurosis 9	608553	AR
NMNAT1, NMNAT, PNAT1, LCA9, SHILCA	NMNAT1	Nicotinamide nucleotide adenylyltransferase 1	608700	Spondyloepiphyseal dysplasia, sensorineural hearing loss, intellectual developmental disorder, and Leber congenital amaurosis	619260	AR
PIGV, HPMRS1	PIGV	Phosphatidylinositol glycan, class V	610274	Hyperphosphatasia with impaired intellectual development syndrome 1	239300	AR
ST3GAL3, SIAT6, ST3GALII, MRT12, DEE15	ST3GAL3	ST3 beta-galactoside alpha-2,3-sialyltransferase 3	606494	Developmental and epileptic encephalopathy 15	615006	AR
ST3GAL3, SIAT6, ST3GALII, MRT12, DEE15	ST3GAL3	ST3 beta-galactoside alpha-2,3-sialyltransferase 3	606494	Intellectual developmental disorder, autosomal recessive 12	611090	AR
POMGNT1, MEB, MDDGA3, MDDGB3, MDDGC3, RP76, LGMDR15	POMGNT1	Protein 0-mannose beta-1,2-N-acetylglucosaminyltransferase	606822	Muscular dystrophy-dystroglycanopathy (congenital with brain and eye anomalies), type A, 3	253280	AR
POMGNT1, MEB, MDDGA3, MDDGB3, MDDGC3, RP76, LGMDR15	POMGNT1	Protein 0-mannose beta-1,2-N-acetylglucosaminyltransferase	606822	Muscular dystrophy-dystroglycanopathy (congenital with impaired intellectual development), type B, 3	613151	AR
POMGNT1, MEB, MDDGA3, MDDGB3, MDDGC3, RP76, LGMDR15	POMGNT1	Protein 0-mannose beta-1,2-N-acetylglucosaminyltransferase	606822	Muscular dystrophy-dystroglycanopathy (limb-girdle), type C, 3	613157	AR
POMGNT1, MEB, MDDGA3, MDDGB3, MDDGC3, RP76, LGMDR15	POMGNT1	Protein 0-mannose beta-1,2-N-acetylglucosaminyltransferase	606822	Retinitis pigmentosa 76	617123	AR
ALG14, CMS15, IDDEBF, MEPCA	ALG14	ALG14 UDP-N-acetylglucosaminyltransferase subunit	612866	?Myasthenic syndrome, congenital, 15, without tubular aggregates	616227	AR
ALG14, CMS15, IDDEBF, MEPCA	ALG14	ALG14 UDP-N-acetylglucosaminyltransferase subunit	612866	Intellectual developmental disorder with epilepsy, behavioral abnormalities, and coarse facies	619031	AR
ALG14, CMS15, IDDEBF, MEPCA	ALG14	ALG14 UDP-N-acetylglucosaminyltransferase subunit	612866	Myopathy, epilepsy, and progressive cerebral atrophy	619036	AR
SLC35A3, AMRS	SLC35A3	Solute carrier family 35 (UDP-GlcNAc transporter), member 3	605632	Arthrogryposis, impaired intellectual development, and seizures	615553	AR
TAF13, TAF2K, MRT60	TAF13	TAF13 RNA polymerase II, TATA box-binding protein-associated factor, 18kD	600774	Intellectual developmental disorder, autosomal recessive 60	617432	AR
SLC6A17, NTT4, MRT48	SLC6A17	Solute carrier family 6 (neurotransmitter transporter), member 17	610299	Intellectual developmental disorder, autosomal recessive 48	616269	AR
ATP1A1, CMT2DD, HOMGSMR2	ATP1A1	ATPase, Na+K+ transporting, alpha-1 polypeptide	182310	Charcot-Marie-Tooth disease, axonal, type 2DD	618036	AD
ATP1A1, CMT2DD, HOMGSMR2	ATP1A1	ATPase, Na+K+ transporting, alpha-1 polypeptide	182310	Hypomagnesemia, seizures, and impaired intellectual development 2	618314	AD
DPM3, MDDGC15, MDDGB15	DPM3	Dolichyl-phosphate mannosyltransferase 3	605951	?Muscular dystrophy-dystroglycanopathy (congenital with impaired intellectual development), type B, 15	618992	AR
DPM3, MDDGC15, MDDGB15	DPM3	Dolichyl-phosphate mannosyltransferase 3	605951	Muscular dystrophy-dystroglycanopathy (limb-girdle), type C, 15	612937	AR
ASH1L, KIAA1420, ASH1, MRD52	ASH1L	ASH1-like histone lysine methyltransferase	607999	Intellectual developmental disorder, autosomal dominant 52	617796	AD
TMCO1, CFSMR1	TMCO1	Transmembrane and coiled-coil domains protein 1	614123	Craniofacial dysmorphism, skeletal anomalies, and impaired intellectual development 1	213980	AR
TPR, MRT79	TPR	Tumor potentiating region (translocated promoter region)	189940	?Intellectual developmental disorder, autosomal recessive 79	620393	AR
KDM5B, JARID1B, PUT1, PLU1, RBBP2H1A, MRT65	KDM5B	Lysine-specific demethylase 5B	605393	Intellectual developmental disorder, autosomal recessive 65	618109	AR
FMN2, MRT47	FMN2	Formin 2	606373	Intellectual developmental disorder, autosomal recessive 47	616193	AR
ZBTB18, ZNF238, RP58, MRD22	ZBTB18	Zinc finger and BTB domain containing 18	608433	Intellectual developmental disorder, autosomal dominant 22	612337	AD
MYT1L, KIAA1106, MRD39	MYT1L	Myelin transcription factor 1-like	613084	Intellectual developmental disorder, autosomal dominant 39	616521	AD
SOX11, MRD27, IDDMOH	SOX11	SRY-box 11	600898	Intellectual developmental disorder with microcephaly and with or without ocular malformations or hypogonadotropic hypogonadism	615866	AD
KIDINS220, ARMS, SINO, VENARG	KIDINS220	Kinase D-interacting substrate, 220kD	615759	Spastic paraplegia, intellectual disability, nystagmus, and obesity	617296	AD
KIDINS220, ARMS, SINO, VENARG	KIDINS220	Kinase D-interacting substrate, 220kD	615759	Ventriculomegaly and arthrogryposis	619501	AR
PIGF, OORS	PIGF	Phosphatidylinositol glycan, class F	600153	Onychodystrophy, osteodystrophy, impaired intellectual development, and seizures syndrome	619356	AR
FBXO11, FBX11, VIT1, PRMT9, IDDFBA	FBXO11	F-box only protein 11	607871	Intellectual developmental disorder with dysmorphic facies and behavioral abnormalities	618089	AD
LMAN2L, VIPL, MRT52, MRD69	LMAN2L	Lectin, mannose binding 2-like	609552	?Intellectual developmental disorder, autosomal dominant 69	617863	AD
LMAN2L, VIPL, MRT52, MRD69	LMAN2L	Lectin, mannose binding 2-like	609552	?Intellectual developmental disorder, autosomal recessive 52	616887	AR
HNMT, MRT51	HNMT	Histamine N-methyltransferase	605238	{Asthma, susceptibility to}	600807	AD
HNMT, MRT51	HNMT	Histamine N-methyltransferase	605238	Intellectual developmental disorder, autosomal recessive 51	616739	AR
MBD5, KIAA1461, MRD1	MBD5	Methyl-CpG-binding domain protein 5	611472	Intellectual developmental disorder, autosomal dominant 1	156200	AD
NR4A2, NURR1, NOT, TINUR, IDLDP	NR4A2	Nuclear receptor subfamily 4, group A, member 2	601828	Intellectual developmental disorder with language impairment and early-onset DOPA-responsive dystonia-parkinsonism	619911	AD
TBR1, IDDAS	TBR1	T-box, brain, 1	604616	Intellectual developmental disorder with autism and speech delay	606053	AD
METTL5, HSPC133, MRT72	METTL5	Methyltransferase 5, N6-adenosine	618628	Intellectual developmental disorder, autosomal recessive 72	618665	AR
GLS, GLS1, DEE71, CASGID, GDPAG	GLS	Glutaminase	138280	?Infantile cataract, skin abnormalities, glutamate excess, and impaired intellectual development	618339	AD
GLS, GLS1, DEE71, CASGID, GDPAG	GLS	Glutaminase	138280	Developmental and epileptic encephalopathy 71	618328	AR
GLS, GLS1, DEE71, CASGID, GDPAG	GLS	Glutaminase	138280	Global developmental delay, progressive ataxia, and elevated glutamine	618412	AR
GMPPA, AAMR	GMPPA	GDP-mannose pyrophosphorylase A	615495	Alacrima, achalasia, and impaired intellectual development syndrome	615510	AR
TRIP12, MRD49	TRIP12	Thyroid hormone receptor interactor 12	604506	Intellectual developmental disorder, autosomal dominant 49	617752	AD
CRBN, MRT2	CRBN	Cereblon	609262	Intellectual developmental disorder, autosomal recessive 2	607417	AR
SETD5, KIAA1757, MRD23	SETD5	SET domain-containing protein 5	615743	Intellectual developmental disorder, autosomal dominant 23	615761	AD
BRPF1, BR140, IDDDFP	BRPF1	Bromodomain- and PHD finger-containing protein 1, 140kD	602410	Intellectual developmental disorder with dysmorphic facies and ptosis	617333	AD
IQSEC1, KIAA0763, IDDSSBA	IQSEC1	IQ motif- and Sec7 domain-containing protein 1	610166	Intellectual developmental disorder with short stature and behavioral abnormalities	618687	AR
SETD2, SET2, HYPB, HBP231, KIAA1732, LLS, RAPAS, MRD70	SETD2	SET domain-containing protein 2	612778	Intellectual developmental disorder, autosomal dominant 70	620157	AD
SETD2, SET2, HYPB, HBP231, KIAA1732, LLS, RAPAS, MRD70	SETD2	SET domain-containing protein 2	612778	Luscan-Lumish syndrome	616831	AD
SETD2, SET2, HYPB, HBP231, KIAA1732, LLS, RAPAS, MRD70	SETD2	SET domain-containing protein 2	612778	Rabin-Pappas syndrome	620155	AD
P4HTM, PH4, HIDEA	P4HTM	Prolyl 4-hydroxylase, transmembrane	614584	Hypotonia, hypoventilation, impaired intellectual development, dysautonomia, epilepsy, and eye abnormalities	618493	AR
GMPPB, KIAA1851, MDDGA14, MDDGB14, MDDGC14, LGMDR19	GMPPB	GDP-mannose pyrophosphorylase B	615320	Muscular dystrophy-dystroglycanopathy (congenital with brain and eye anomalies), type A, 14	615350	AR
GMPPB, KIAA1851, MDDGA14, MDDGB14, MDDGC14, LGMDR19	GMPPB	GDP-mannose pyrophosphorylase B	615320	Muscular dystrophy-dystroglycanopathy (congenital with impaired intellectual development), type B, 14	615351	AR
GMPPB, KIAA1851, MDDGA14, MDDGB14, MDDGC14, LGMDR19	GMPPB	GDP-mannose pyrophosphorylase B	615320	Muscular dystrophy-dystroglycanopathy (limb-girdle), type C, 14	615352	AR
DOCK3, NEDIDHA	DOCK3	Dedicator of cytokinesis 3	603123	Neurodevelopmental disorder with impaired intellectual development, hypotonia, and ataxia	618292	AR
FOXP1, QRF1	FOXP1	Forkhead box P1	605515	Intellectual developmental disorder with language impairment with or without autistic features	613670	AD
ZBTB11, MRT69	ZBTB11	Zinc finger- and BTB domain-containing protein 11	618181	Intellectual developmental disorder, autosomal recessive 69	618383	AR
STAG1, MRD47	STAG1	Stromal antigen 1	604358	Intellectual developmental disorder, autosomal dominant 47	617635	AD
ZIC1, CRS6, BAIDCS	ZIC1	Zic family, member 1	600470	?Craniosynostosis 6	616602	AD
ZIC1, CRS6, BAIDCS	ZIC1	Zic family, member 1	600470	Structural brain anomalies with impaired intellectual development and craniosynostosis	618736	AD
RSRC1, SRRP53, MRT70	RSRC1	Arginine/serine-rich coiled-coil protein 1	613352	Intellectual developmental disorder, autosomal recessive 70	618402	AR
TNIK, KIAA0551, MRT54	TNIK	TRAF2-and NCK-interacting kinase	610005	Intellectual developmental disorder, autosomal recessive 54	617028	AR
TBL1XR1, TBLR1, IRA1, C21, MRD41	TBL1XR1	Transducin-beta-like 1 receptor 1	608628	Intellectual developmental disorder, autosomal dominant 41	616944	AD
TBL1XR1, TBLR1, IRA1, C21, MRD41	TBL1XR1	Transducin-beta-like 1 receptor 1	608628	Pierpont syndrome	602342	AD
AP2M1, CLAPM1, MRD60	AP2M1	Adaptor-related protein complex 2, mu 1 subunit	601024	Intellectual developmental disorder 60 with seizures	618587	AD
AHSG, APMR1	AHSG	Alpha-2HS-glycoprotein	138680	?Alopecia-intellectual disability syndrome 1	203650	AR
PIGY, HPMRS6	PIGY	Phosphatidylinositol glycan, class Y	610662	Hyperphosphatasia with impaired intellectual development syndrome 6	616809	AR
PPP3CA, PPP2B, CALNA, CNA1, DEE91, ACCIID	PPP3CA	Protein phosphatase 3, catalytic subunit, alpha isoform (calcineurin A alpha)	114105	Arthrogryposis, cleft palate, craniosynostosis, and impaired intellectual development	618265	AD
PPP3CA, PPP2B, CALNA, CNA1, DEE91, ACCIID	PPP3CA	Protein phosphatase 3, catalytic subunit, alpha isoform (calcineurin A alpha)	114105	Developmental and epileptic encephalopathy 91	617711	AD
PRSS12, BSSP3, MRT1	PRSS12	Protease, serine, 12	606709	Intellectual developmental disorder, autosomal recessive 1	249500	AR
NAA15, NARG1, NATH, MRD50	NAA15	N-alpha-acetyltransferase 15, NatA auxiliary subunit	608000	Intellectual developmental disorder, autosomal dominant 50, with behavioral abnormalities	617787	AD
NSUN2, TRM4, SAKI, MISU, MRT5	NSUN2	NOP2/SUN RNA methyltransferase family, member 2	610916	Intellectual developmental disorder, autosomal recessive 5	611091	AR
TRIO, MRD44, MRD63	TRIO	Triple functional domain	601893	Intellectual developmental disorder, autosomal dominant 44, with microcephaly	617061	AD
TRIO, MRD44, MRD63	TRIO	Triple functional domain	601893	Intellectual developmental disorder, autosomal dominant 63, with macrocephaly	618825	AD
COL4A3BP, GPBP, CERT, MRD34	CERT1	Ceramide transporter 1	604677	Intellectual developmental disorder, autosomal dominant 34	616351	AD
CAMK2A, KIAA0968, CAMKA, MRD53, MRT63	CAMK2A	Calcium/calmodulin-dependent protein kinase II-alpha	114078	?Intellectual developmental disorder, autosomal recessive 63	618095	AR
CAMK2A, KIAA0968, CAMKA, MRD53, MRT63	CAMK2A	Calcium/calmodulin-dependent protein kinase II-alpha	114078	Intellectual developmental disorder, autosomal dominant 53	617798	AD
NDST1, HSST, MRT46	NDST1	N-deacetylase/N-sulfotransferase (heparan sulfate-N-deacetylase/N-sulfotransferase)	600853	Intellectual developmental disorder, autosomal recessive 46	616116	AR
GRIA1, GLUR1, MRD67, MRT76	GRIA1	Glutamate receptor, ionotropic, AMPA 1	138248	?Intellectual developmental disorder, autosomal recessive 76	619931	AR
GRIA1, GLUR1, MRD67, MRT76	GRIA1	Glutamate receptor, ionotropic, AMPA 1	138248	Intellectual developmental disorder, autosomal dominant 67	619927	AD
JARID2, JMJ, DIDDF	JARID2	Jumonji and AT-rich interaction domain containing 2	601594	Developmental delay with variable intellectual disability and dysmorphic facies	620098	AD
SYNGAP1, MRD5	SYNGAP1	Synaptic Ras GTPase activating protein 1	603384	Intellectual developmental disorder, autosomal dominant 5	612621	AD
KCNQ5, MRD46	KCNQ5	Potassium channel, voltage-gated, KQT-like subfamily, member 5	607357	Intellectual developmental disorder, autosomal dominant 46	617601	AD
ELOVL4, ADMD, STGD2, STGD3, ISQMR, SCA34	ELOVL4	Elongation of very long chain fatty acids 4	605512	Ichthyosis, spastic quadriplegia, and impaired intellectual development	614457	AR
ELOVL4, ADMD, STGD2, STGD3, ISQMR, SCA34	ELOVL4	Elongation of very long chain fatty acids 4	605512	Spinocerebellar ataxia 34	133190	AD
ELOVL4, ADMD, STGD2, STGD3, ISQMR, SCA34	ELOVL4	Elongation of very long chain fatty acids 4	605512	Stargardt disease 3	600110	AD
ZNF292, ZFP292, KIAA0530, MRD64	ZNF292	Zinc finger protein 292	616213	Intellectual developmental disorder, autosomal dominant 64	619188	AD
PRDM13, CDIDHH, PCH17	PRDM13	PR domain-containing protein 13	616741	Cerebellar dysfunction, impaired intellectual development, and hypogonadotropic hypogonadism	619761	AR
PRDM13, CDIDHH, PCH17	PRDM13	PR domain-containing protein 13	616741	Pontocerebellar hypoplasia, type 17	619909	AR
ASCC3, p200, MRT81	ASCC3	Activating signal cointegrator 1 complex, subunit 3	614217	Intellectual developmental disorder, autosomal recessive 81	620700	AR
GRIK2, GLUR6, MRT6, NEDLAS	GRIK2	Glutamate receptor, ionotropic, kainate 2	138244	Intellectual developmental disorder, autosomal recessive 6	611092	AR
GRIK2, GLUR6, MRT6, NEDLAS	GRIK2	Glutamate receptor, ionotropic, kainate 2	138244	Neurodevelopmental disorder with impaired language and ataxia and with or without seizures	619580	AD
RTN4IP1, NIMP, OPA10	RTN4IP1	Reticulon 4-interacting protein 1	610502	Optic atrophy 10 with or without ataxia, impaired intellectual development and seizures	616732	AR
SOBP, JXC1, MRAMS	SOBP	Sine oculis-binding protein homolog	613667	?Impaired intellectual development, anterior maxillary protrusion, and strabismus	613671	AR
NUS1, NGBR, C6orf68, CDG1AA, MRD55	NUS1	NUS1 dehydrodolichyl diphosphate synthase subunit	610463	?Congenital disorder of glycosylation, type 1aa	617082	AR
NUS1, NGBR, C6orf68, CDG1AA, MRD55	NUS1	NUS1 dehydrodolichyl diphosphate synthase subunit	610463	Intellectual developmental disorder, autosomal dominant 55, with seizures	617831	AD
MED23, MRT18	MED23	Mediator complex subunit 23	605042	Intellectual developmental disorder, autosomal recessive 18, with or without epilepsy	614249	AR
HIVEP2, MRD43	HIVEP2	Human immunodeficiency virus type I enhancer-binding protein-2	143054	Intellectual developmental disorder, autosomal dominant 43	616977	AD
WIPI2, IDDSSA	WIPI2	WD40 repeat protein interacting with phosphoinositides 2	609225	?Intellectual developmental disorder with short stature and variable skeletal anomalies	618453	AR
RAC1, MRD48	RAC1	Rac family small GTPase 1	602048	Intellectual developmental disorder, autosomal dominant 48	617751	AD
CDK13, CDC2L5, CHED, CHDFIDD	CDK13	Cyclin-dependent kinase 13	603309	Congenital heart defects, dysmorphic facial features, and intellectual developmental disorder	617360	AD
CAMK2B, MRD54	CAMK2B	Calcium/calmodulin-dependent protein kinase II-beta	607707	Intellectual developmental disorder, autosomal dominant 54	617799	AD
KIAA0442, MRD26, AUTS2	AUTS2	KIAA0442 gene	607270	Intellectual developmental disorder, autosomal dominant 26	615834	AD
ACTL6B, BAF53B, IDDSSAD, DEE76	ACTL6B	Actin-like 6B	612458	Developmental and epileptic encephalopathy 76	618468	AR
ACTL6B, BAF53B, IDDSSAD, DEE76	ACTL6B	Actin-like 6B	612458	Intellectual developmental disorder with severe speech and ambulation defects	618470	AD
CUX1, CUTL1, CDP, GDDI	CUX1	Cut-like homeobox 1	116896	Global developmental delay with or without impaired intellectual development	618330	AD
PUS7, KIAA1897, IDDABS	PUS7	Pseudouridylate synthase 7, putative	616261	Intellectual developmental disorder with abnormal behavior, microcephaly, and short stature	618342	AR
CASP2, NEDD2, ICH1, MRT80	CASP2	Caspase 2, apoptosis-related cysteine protease (neural precursor cell expressed, developmentally down-regulated 2)	600639	Intellectual developmental disorder, autosomal recessive 80, with variant lissencephaly	620653	AR
DPP6, VF2, MRD33	DPP6	Dipeptidylpeptidase VI	126141	{Ventricular fibrillation, paroxysmal familial, 2}	612956	AD
DPP6, VF2, MRD33	DPP6	Dipeptidylpeptidase VI	126141	Intellectual developmental disorder, autosomal dominant 33	616311	AD
TUSC3, M33, D8S1992, MRT7, MRT22	TUSC3	Tumor suppressor candidate 3	601385	Intellectual developmental disorder, autosomal recessive 7	611093	AR
LGI3, IDDMDS	LGI3	Leucine-rich gene, glioma-inactivated, 3	608302	Intellectual developmental disorder with muscle tone abnormalities and distal skeletal defects	620007	AR
TTI2, C8orf41, MRT39	TTI2	TELO2-interacting protein 2	614426	Intellectual developmental disorder, autosomal recessive 39	615541	AR
CA8, CALS, CARP, CAMRQ3	CA8	Carbonic anhydrase VIII	114815	Cerebellar ataxia, impaired intellectual development and dysequilibrium syndrome 3	613227	AR
IMPA1, MRT59	IMPA1	Inositol(myo)-1(or 4)-monophosphatase-1	602064	Intellectual developmental disorder, autosomal recessive 59	617323	AR
OTUD6B, DUBA5, IDDFSDA	OTUD6B	OTU domain-containing protein 6B	612021	Intellectual developmental disorder with dysmorphic facies, seizures, and distal limb anomalies	617452	AR
TAF2, TAF2B, TAFII150, CIF150, MRT40	TAF2	TAF2 RAN polymerase II, TATA box-binding protein-associated factor, 150kD	604912	Intellectual developmental disorder, autosomal recessive 40	615599	AR
TRAPPC9, NIBP, KIAA1882, MRT13	TRAPPC9	Trafficking protein particle complex 9	611966	Intellectual developmental disorder, autosomal recessive 13	613192	AR
SMARCA2, SNF2L2, NCBRS, BIS	SMARCA2	SWI/SNF related, matrix associated, actin dependent regulator of chromatin, subfamily a, member 2	600014	Blepharophimosis-impaired intellectual development syndrome	619293	AD
SMARCA2, SNF2L2, NCBRS, BIS	SMARCA2	SWI/SNF related, matrix associated, actin dependent regulator of chromatin, subfamily a, member 2	600014	Nicolaides-Baraitser syndrome	601358	AD
VLDLR, CAMRQ1	VLDLR	Very low density lipoprotein receptor	192977	Cerebellar hypoplasia, impaired intellectual development, and dysequilibrium syndrome 1	224050	AR
NFIB, MACID	NFIB	Nuclear factor I/B	600728	Macrocephaly, acquired, with impaired intellectual development	618286	AD
NUDT2, APAH1, IDDPN	NUDT2	Nudix hydrolase 2	602852	Intellectual developmental disorder with or without peripheral neuropathy	619844	AR
PIGO, HPMRS2	PIGO	Phosphatidylinositol glycan, class O	614730	Hyperphosphatasia with impaired intellectual development syndrome 2	614749	AR
RUSC2, KIAA0375, IPORIN, MRT61	RUSC2	RUN and SH3 domain-containing 2	611053	Intellectual developmental disorder, autosomal recessive 61	617773	AR
IARS1, IARS, GRIDHH	IARS1	Isoleucine-tRNA synthetase 1	600709	Growth retardation, impaired intellectual development, hypotonia, and hepatopathy	617093	AR
FKTN, FCMD, CMD1X, LGMDR13, MDDGA4, MDDGB4, MDDGC4	FKTN	Fukutin	607440	Cardiomyopathy, dilated, 1X	611615	AR
FKTN, FCMD, CMD1X, LGMDR13, MDDGA4, MDDGB4, MDDGC4	FKTN	Fukutin	607440	Muscular dystrophy-dystroglycanopathy (congenital with brain and eye anomalies), type A, 4	253800	AR
FKTN, FCMD, CMD1X, LGMDR13, MDDGA4, MDDGB4, MDDGC4	FKTN	Fukutin	607440	Muscular dystrophy-dystroglycanopathy (congenital without impaired intellectual development), type B, 4	613152	AR
FKTN, FCMD, CMD1X, LGMDR13, MDDGA4, MDDGB4, MDDGC4	FKTN	Fukutin	607440	Muscular dystrophy-dystroglycanopathy (limb-girdle), type C, 4	611588	AR
SET, MRD58	SET	SET gene	600960	Intellectual developmental disorder, autosomal dominant 58	618106	AD
PTPA, PPP2R4, PARK25	PTPA	Protein phosphatase 2 phosphatase activator	600756	Parkinson disease 25, autosomal recessive early-onset, with impaired intellectual development	620482	AR
POMT1, MDDGA1, MDDGB1, MDDGC1, LGMDR11	POMT1	Protein O-mannosyltransferase 1	607423	Muscular dystrophy-dystroglycanopathy (congenital with brain and eye anomalies), type A, 1	236670	AR
POMT1, MDDGA1, MDDGB1, MDDGC1, LGMDR11	POMT1	Protein O-mannosyltransferase 1	607423	Muscular dystrophy-dystroglycanopathy (congenital with impaired intellectual development), type B, 1	613155	AR
POMT1, MDDGA1, MDDGB1, MDDGC1, LGMDR11	POMT1	Protein O-mannosyltransferase 1	607423	Muscular dystrophy-dystroglycanopathy (limb-girdle), type C, 1	609308	AR
INPP5E, MORMS, JBTS1, CORS1	INPP5E	Inositol polyphosphate-5-phosphatase, 72kD	613037	Impaired intellectual development, truncal obesity, retinal dystrophy, and micropenis syndrome	610156	AR
INPP5E, MORMS, JBTS1, CORS1	INPP5E	Inositol polyphosphate-5-phosphatase, 72kD	613037	Joubert syndrome 1	213300	AR
ABCA2, ABC2, IDPOGSA	ABCA2	ATP-binding cassette 2	600047	Intellectual developmental disorder with poor growth and with or without seizures or ataxia	618808	AR
ZMYND11, BS69, BRAM1, MRD30	ZMYND11	Zinc finger MYND domain-containing protein 11	608668	Intellectual developmental disorder, autosomal dominant 30	616083	AD
NSUN6, MRT82	NSUN6	NOP2/SUN RNA methyltransferase family, member 6	617199	Intellectual developmental disorder, autosomal recessive 82	620779	AR
ANK3, MRT37	ANK3	Ankyrin-3, node of Ranvier	600465	Intellectual developmental disorder, autosomal recessive 37	615493	AR
CAMK2G, CAMKG, MRD59	CAMK2G	Calcium/calmodulin-dependent protein kinase (CaM kinase) II gamma	602123	Intellectual developmental disorder, autosomal dominant 59	618522	AD
KIF11, KNSL1, MCLMR	KIF11	Kinesin family member 11	148760	Microcephaly with or without chorioretinopathy, lymphedema, or impaired intellectual development	152950	AD
CNNM2, ACDP2, HOMG6, HOMGSMR	CNNM2	Cyclin M2	607803	Hypomagnesemia 6, renal	613882	AD
CNNM2, ACDP2, HOMG6, HOMGSMR	CNNM2	Cyclin M2	607803	Hypomagnesemia, seizures, and impaired intellectual development 1	616418	AD, AR
PDZD8, IDDADF	PDZD8	PDZ domain-containing protein 8	614235	Intellectual developmental disorder with autism and dysmorphic facies	620021	AR
WDR11, DR11, KIAA1351, BRWD2, HH14	WDR11	WD repeat-containing protein 11	606417	Hypogonadotropic hypogonadism 14 with or without anosmia	614858	AD
WDR11, DR11, KIAA1351, BRWD2, HH14	WDR11	WD repeat-containing protein 11	606417	Intellectual developmental disorder, autosomal recessive 78	620237	AR
FGFR2, BEK, CFD1, JWS, TK14, BBDS	FGFR2	Fibroblast growth factor receptor-2 (bacteria-expressed kinase)	176943	?Scaphocephaly, maxillary retrusion, and impaired intellectual development	609579
FGFR2, BEK, CFD1, JWS, TK14, BBDS	FGFR2	Fibroblast growth factor receptor-2 (bacteria-expressed kinase)	176943	Antley-Bixler syndrome without genital anomalies or disordered steroidogenesis	207410	AD
FGFR2, BEK, CFD1, JWS, TK14, BBDS	FGFR2	Fibroblast growth factor receptor-2 (bacteria-expressed kinase)	176943	Apert syndrome	101200	AD
FGFR2, BEK, CFD1, JWS, TK14, BBDS	FGFR2	Fibroblast growth factor receptor-2 (bacteria-expressed kinase)	176943	Beare-Stevenson cutis gyrata syndrome	123790	AD
FGFR2, BEK, CFD1, JWS, TK14, BBDS	FGFR2	Fibroblast growth factor receptor-2 (bacteria-expressed kinase)	176943	Bent bone dysplasia syndrome	614592	AD
FGFR2, BEK, CFD1, JWS, TK14, BBDS	FGFR2	Fibroblast growth factor receptor-2 (bacteria-expressed kinase)	176943	Craniofacial-skeletal-dermatologic dysplasia	101600	AD
FGFR2, BEK, CFD1, JWS, TK14, BBDS	FGFR2	Fibroblast growth factor receptor-2 (bacteria-expressed kinase)	176943	Craniosynostosis, nonspecific
FGFR2, BEK, CFD1, JWS, TK14, BBDS	FGFR2	Fibroblast growth factor receptor-2 (bacteria-expressed kinase)	176943	Crouzon syndrome	123500	AD
FGFR2, BEK, CFD1, JWS, TK14, BBDS	FGFR2	Fibroblast growth factor receptor-2 (bacteria-expressed kinase)	176943	Gastric cancer, somatic	613659
FGFR2, BEK, CFD1, JWS, TK14, BBDS	FGFR2	Fibroblast growth factor receptor-2 (bacteria-expressed kinase)	176943	Jackson-Weiss syndrome	123150	AD
FGFR2, BEK, CFD1, JWS, TK14, BBDS	FGFR2	Fibroblast growth factor receptor-2 (bacteria-expressed kinase)	176943	LADD syndrome 1	149730	AD
FGFR2, BEK, CFD1, JWS, TK14, BBDS	FGFR2	Fibroblast growth factor receptor-2 (bacteria-expressed kinase)	176943	Pfeiffer syndrome	101600	AD
FGFR2, BEK, CFD1, JWS, TK14, BBDS	FGFR2	Fibroblast growth factor receptor-2 (bacteria-expressed kinase)	176943	Saethre-Chotzen syndrome	101400	AD
FGFR2, BEK, CFD1, JWS, TK14, BBDS	FGFR2	Fibroblast growth factor receptor-2 (bacteria-expressed kinase)	176943	Scaphocephaly and Axenfeld-Rieger anomaly
PIDD1, LRDD, MRT75	PIDD1	p53-induced death domain protein 1	605247	Intellectual developmental disorder, autosomal recessive 75, with neuropsychiatric features and variant lissencephaly	619827	AR
PGAP2, FRAG1, HPMRS3, MRT17, MRT21	PGAP2	Post-GPI attachment to proteins 2	615187	Hyperphosphatasia with impaired intellectual development syndrome 3	614207	AR
EIF3F, EIF3S5, MRT67	EIF3F	Eukaryotic translation initiation factor 3, subunit F	603914	Intellectual developmental disorder, autosomal recessive 67	618295	AR
KCNA4, KCNA8, MCIDDS	KCNA4	Potassium voltage-gated channel, shaker-related subfamily, member 4	176266	Microcephaly, cataracts, impaired intellectual development, and dystonia with abnormal striatum	618284	AR
PHF21A, BHC80, KIAA1696, IDDBCS	PHF21A	PHD finger protein 21A	608325	Intellectual developmental disorder with behavioral abnormalities and craniofacial dysmorphism with or without seizures	618725	AD
PSMC3, TBP1, DCIDP	PSMC3	Proteasome (prosome, macropain) 26S subunit, ATPase, 3	186852	?Deafness, cataract, impaired intellectual development, and polyneuropathy	619354	AR
KCNK4, TRAAK, FHEIG	KCNK4	Potassium channel, subfamily K, member 4	605720	Facial dysmorphism, hypertrichosis, epilepsy, intellectual/developmental delay, and gingival overgrowth syndrome	618381	AD
KMT5B, SUV420H1, CGI85, MRD51	KMT5B	Lysine methyltransferase 5B	610881	Intellectual developmental disorder, autosomal dominant 51	617788	AD
PDE2A, IDDPADS	PDE2A	Phosphodiesterase 2A	602658	Intellectual developmental disorder with paroxysmal dyskinesia or seizures	619150	AR
PAK1, IDDMSSD	PAK1	p21/CDC42/RAC1-activated kinase 1	602590	Intellectual developmental disorder with macrocephaly, seizures, and speech delay	618158	AD
YAP1, COB1	YAP1	YES1-associated transcriptional regulator	606608	Coloboma, ocular, with or without hearing impairment, cleft lip/palate, and/or impaired intellectual development	120433	AD
ALKBH8, ABH8, MRT71	ALKBH8	AlkB homolog 8, tRNA methyltransferase	613306	Intellectual developmental disorder, autosomal recessive 71	618504	AR
DDX6, HLR2, IDDILF	DDX6	DEAD-box helicase 6	600326	Intellectual developmental disorder with impaired language and dysmorphic facies	618653	AD
HEPACAM, MLC2A, MLC2B	HEPACAM	Hepatocyte cell adhesion molecule	611642	Megalencephalic leukoencephalopathy with subcortical cysts 2A	613925	AR
HEPACAM, MLC2A, MLC2B	HEPACAM	Hepatocyte cell adhesion molecule	611642	Megalencephalic leukoencephalopathy with subcortical cysts 2B, remitting, with or without impaired intellectual development	613926	AD
C12orf4, MRT66	FERRY3	Chromosome 12 open reading frame 4	616082	Intellectual developmental disorder, autosomal recessive 66	618221	AR
GRIN2B, NMDAR2B, MRD6, DEE27	GRIN2B	Glutamate receptor, ionotropic, N-methyl D-aspartate 2B	138252	Developmental and epileptic encephalopathy 27	616139	AD
GRIN2B, NMDAR2B, MRD6, DEE27	GRIN2B	Glutamate receptor, ionotropic, N-methyl D-aspartate 2B	138252	Intellectual developmental disorder, autosomal dominant 6, with or without seizures	613970	AD
ABCC9, SUR2, CMD1O, ATFB12, CANTU, IDMYS	ABCC9	ATP-binding cassette, subfamily C, member 9 (sulfonylurea receptor 2)	601439	?Atrial fibrillation, familial, 12	614050	AD
ABCC9, SUR2, CMD1O, ATFB12, CANTU, IDMYS	ABCC9	ATP-binding cassette, subfamily C, member 9 (sulfonylurea receptor 2)	601439	Cardiomyopathy, dilated, 1O	608569	AD
ABCC9, SUR2, CMD1O, ATFB12, CANTU, IDMYS	ABCC9	ATP-binding cassette, subfamily C, member 9 (sulfonylurea receptor 2)	601439	Hypertrichotic osteochondrodysplasia (Cantu syndrome)	239850	AD
ABCC9, SUR2, CMD1O, ATFB12, CANTU, IDMYS	ABCC9	ATP-binding cassette, subfamily C, member 9 (sulfonylurea receptor 2)	601439	Intellectual disability and myopathy syndrome	619719	AR
DIP2B, KIAA1463	DIP2B	Disco-interacting protein 2 homolog B	611379	Intellectual developmental disorder, autosomal dominant, FRA12A type	136630	AD
CNOT2, NOT2, IDNADFS	CNOT2	CCR4-NOT transcription complex, subunit 2	604909	Intellectual developmental disorder with nasal speech, dysmorphic facies, and variable skeletal anomalies	618608	AD
ATP2B1, PMCA1, MRD66	ATP2B1	ATPase, Ca++ transporting, plasma membrane, 1	108731	Intellectual developmental disorder, autosomal dominant 66	619910	AD
CRADD, RAIDD, MRT34	CRADD	Caspase and RIP adaptor with death domain	603454	Intellectual developmental disorder, autosomal recessive 34, with variant lissencephaly	614499	AR
WASHC4, KIAA1033, SWIP, MRT43	WASHC4	WASH complex, subunit 4	615748	Intellectual developmental disorder, autosomal recessive 43	615817	AR
MED13L, THRAP2, PROSIT240, TRAP240L, KIAA1025, MRFACD	MED13L	Mediator complex subunit 13-like	608771	Impaired intellectual development and distinctive facial features with or without cardiac defects	616789	AD
SETD1B, SET1B, KIAA1076, IDDSELD	SETD1B	SET domain-containing protein 1B	611055	Intellectual developmental disorder with seizures and language delay	619000	AD
ATP8A2, ATPIB, CAMRQ4	ATP8A2	ATPase, class I, type 8A, member 2	605870	Cerebellar ataxia, impaired intellectual development, and dysequilibrium syndrome 4	615268	AR
CDK8, IDDHBA	CDK8	Cyclin-dependent kinase 8	603184	Intellectual developmental disorder with hypotonia and behavioral abnormalities	618748	AD
FBXL3, FBXL3A, FBL3, IDDSFAS	FBXL3	F-box and leucine-rich repeat protein 3	605653	Intellectual developmental disorder with short stature, facial anomalies, and speech defects	606220	AR
HNRNPC, HNRPC, MRD74	HNRNPC	Heterogeneous nuclear ribonucleoprotein C	164020	Intellectual developmental disorder, autosomal dominant 74	620688	AD
CHD8, DUPLIN, KIAA1564, IDDAM	CHD8	Chromodomain helicase DNA-binding protein 8	610528	Intellectual developmental disorder with autism and macrocephaly	615032	AD
NEMF, SDCCAG1, IDDSAPN	NEMF	Nuclear export mediator factor	608378	Intellectual developmental disorder with speech delay and axonal peripheral neuropathy	619099	AR
POMT2, MDDGA2, MDDGB2, MDDGC2, LGMDR14	POMT2	Putative protein O-mannosyltransferase 2	607439	Muscular dystrophy-dystroglycanopathy (congenital with brain and eye anomalies), type A, 2	613150	AR
POMT2, MDDGA2, MDDGB2, MDDGC2, LGMDR14	POMT2	Putative protein O-mannosyltransferase 2	607439	Muscular dystrophy-dystroglycanopathy (congenital with impaired intellectual development), type B, 2	613156	AR
POMT2, MDDGA2, MDDGB2, MDDGC2, LGMDR14	POMT2	Putative protein O-mannosyltransferase 2	607439	Muscular dystrophy-dystroglycanopathy (limb-girdle), type C, 2	613158	AR
ZC3H14, SUT2, MRT56	ZC3H14	Zinc finger CCCH domain-containing protein 14	613279	Intellectual developmental disorder, autosomal recessive 56	617125	AR
BCL11B, CTIP2, IMD49, IDDFSTA	BCL11B	BAF chromatin remodeling complex subunit BCL11B	606558	Immunodeficiency 49, severe combined	617237	AD
BCL11B, CTIP2, IMD49, IDDFSTA	BCL11B	BAF chromatin remodeling complex subunit BCL11B	606558	Intellectual developmental disorder with dysmorphic facies, speech delay, and T-cell abnormalities	618092	AD
CCNK, IDDHDF	CCNK	Cyclin K	603544	?Intellectual developmental disorder with hypertelorism and distinctive facies	618147	AD
HERC2, SHEP1, MRT38	HERC2	HECT domain and RCC1-like domain 2	605837	[Skin/hair/eye pigmentation 1, blond/brown hair]	227220	AR
HERC2, SHEP1, MRT38	HERC2	HECT domain and RCC1-like domain 2	605837	[Skin/hair/eye pigmentation 1, blue/nonblue eyes]	227220	AR
HERC2, SHEP1, MRT38	HERC2	HECT domain and RCC1-like domain 2	605837	Intellectual developmental disorder, autosomal recessive 38	615516	AR
MEIS2, MRG1, CPCMR	MEIS2	Meis homeobox 2	601740	Cleft palate, cardiac defects, and impaired intellectual development	600987	AD
GNB5, GB5, LDMLS1, LDMLS2	GNB5	Guanine nucleotide-binding protein, beta-5	604447	Lodder-Merla syndrome, type 1, with impaired intellectual development and cardiac arrhythmia	617173	AR
GNB5, GB5, LDMLS1, LDMLS2	GNB5	Guanine nucleotide-binding protein, beta-5	604447	Lodder-Merla syndrome, type 2, with developmental delay and with or without cardiac arrhythmia	617182	AR
RFX7, RFXDC2, MRD71	RFX7	Regulatory factor X, 7	612660	Intellectual developmental disorder, autosomal dominant 71, with behavioral abnormalities	620330	AD
RORA, IDDECA	RORA	RAR-related orphan receptor A	600825	Intellectual developmental disorder with or without epilepsy or cerebellar ataxia	618060	AD
EDC3, YJDC, MRT50	EDC3	Enhancer of mRNA decapping 3	609842	?Intellectual developmental disorder, autosomal recessive 50	616460	AR
SCAPER, KIAA1454, IDDRP	SCAPER	S-phase cyclin A-associated protein in the endoplasmic reticulum	611611	Intellectual developmental disorder and retinitis pigmentosa	618195	AR
LINGO1, LRRN6A, LERN1, MRT64	LINGO1	Leucine-rich repeat- and Ig domain-containing NOGO receptor-interacting protein 1	609791	Intellectual developmental disorder, autosomal recessive 64	618103	AR
LINS1, WINS1, FLJ10583, MRT27	LINS1	Lines homolog 1	610350	Intellectual developmental disorder, autosomal recessive 27	614340	AR
SRRM2, SRM300, KIAA0324, MRD72	SRRM2	Serine/arginine repetitive matrix 2 (ser/arg-rich splicing factor-related nuclear matrix protein, 300kD)	606032	Intellectual developmental disorder, autosomal dominant 72	620439	AD
GRIN2A, NMDAR2A, FESD, LKS	GRIN2A	Glutamate receptor, ionotropic, N-methyl D-aspartate 2A	138253	Epilepsy, focal, with speech disorder and with or without impaired intellectual development	245570	AD
CTCF, MRD21	CTCF	CCCTC-binding factor	604167	Intellectual developmental disorder, autosomal dominant 21	615502	AD
PRMT7, KIAA1933, SBIDDS	PRMT7	Protein arginine N-methyltransferase 7	610087	Short stature, brachydactyly, intellectual developmental disability, and seizures	617157	AR
MTSS2, MTSS1L, ABBA1, IDDOF	MTSS2	MTSS I-BAR domain containing 2 protein	616951	Intellectual developmental disorder with ocular anomalies and distinctive facial features	620086	AD
FBXO31, FBX31, FBXO14, FBX14, MRT45	FBXO31	F-box only protein 31	609102	?Intellectual developmental disorder, autosomal recessive 45	615979	AR
CDH15, CDH14, CDH3, MRD3	CDH15	Cadherin-15, M-cadherin (myotubule)	114019	Intellectual developmental disorder, autosomal dominant 3	612580	AD
INPP5K, SKIP, MDCCAID	INPP5K	Inositol polyphosphate-5-phosphatase K	607875	Muscular dystrophy, congenital, with cataracts and intellectual disability	617404	AR
WDR81, CAMRQ2, HYC3	WDR81	WD repeat-containing protein 81	614218	Cerebellar ataxia, impaired intellectual development, and dysquilibrium syndrome 2	610185	AR
WDR81, CAMRQ2, HYC3	WDR81	WD repeat-containing protein 81	614218	Hydrocephalus, congenital, 3, with brain anomalies	617967	AR
DLG4, PSD95, SAP90, MRD62	DLG4	Discs large MAGUK scaffold protein 4	602887	Intellectual developmental disorder, autosomal dominant 62	618793	AD
POLR2A, RPOL2, NEDHIB	POLR2A	Polymerase (RNA) II (DNA directed) polypeptide A, 220kD	180660	Neurodevelopmental disorder with hypotonia and variable intellectual and behavioral abnormalities	618603	AD
TAOK1, PSK2, TAO1, MARKK, DDIB	TAOK1	TAO kinase 1	610266	Developmental delay with or without intellectual impairment or behavioral abnormalities	619575	AD
PGAP3, PERLD1, CAB2, MGC9753, HPMRS4	PGAP3	Post-GPI attachment to proteins 3	611801	Hyperphosphatasia with impaired intellectual development syndrome 4	615716	AR
CLTC, MRD56	CLTC	Clathrin, heavy polypeptide (Hc)	118955	Intellectual developmental disorder, autosomal dominant 56	617854	AD
MED13, THRAP1, TRAP240, MRD61	MED13	Mediator complex subunit 13	603808	Intellectual developmental disorder, autosomal dominant 61	618009	AD
TLK2, MRD57	TLK2	Tousled-like kinase 2	608439	Intellectual developmental disorder, autosomal dominant 57	618050	AD
TANC2, KIAA1636, IDDALDS	TANC2	Tetratricopeptide repeat-, ankyrin repeat-, and coiled-coil-containing protein 2	615047	Intellectual developmental disorder with autistic features and language delay, with or without seizures	618906	AD
TMEM94, KIAA0195, IDDCDF	TMEM94	Transmembrane protein 94	618163	Intellectual developmental disorder with cardiac defects and dysmorphic facies	618316	AR
METTL23, C17orf95, MRT44	METTL23	Methyltransferase-like 23	615262	Intellectual developmental disorder, autosomal recessive 44	615942	AR
ELP2, STATIP1, MRT58	ELP2	Elongator acetyltransferase complex, subunit 2	616054	Intellectual developmental disorder, autosomal recessive 58	617270	AR
SETBP1, KIAA0437, SEB, MRD29	SETBP1	SET-binding protein 1	611060	Intellectual developmental disorder, autosomal dominant 29	616078	AD
SETBP1, KIAA0437, SEB, MRD29	SETBP1	SET-binding protein 1	611060	Schinzel-Giedion midface retraction syndrome	269150	AD
APC2, APCL, MRT74	APC2	APC regulator of WNT signaling pathway 2	612034	Cortical dysplasia, complex, with other brain malformations 10	618677	AR
APC2, APCL, MRT74	APC2	APC regulator of WNT signaling pathway 2	612034	Intellectual developmental disorder, autosomal recessive 74	617169	AR
KDM4B, JMJD2B, KIAA0876, MRD65	KDM4B	Lysine demethylase 4B	609765	Intellectual developmental disorder, autosomal dominant 65	619320	AD
TNPO2, TRN2, KPNB2B, IDDHISD	TNPO2	Transportin 2	603002	Intellectual developmental disorder with hypotonia, impaired speech, and dysmorphic facies	619556	AD
TRMT1, TRM1, MRT68	TRMT1	tRNA methyltransferase 1	611669	Intellectual developmental disorder, autosomal recessive 68	618302	AR
CC2D1A, MRT3	CC2D1A	Coiled-coil and C2 domain-containing 1A	610055	Intellectual developmental disorder, autosomal recessive 3	608443	AR
TECR, GPSN2, TER, SC2, MRT14	TECR	Trans-2,3-enoyl-CoA reductase	610057	Intellectual developmental disorder, autosomal recessive 14	614020	AR
KMT2B, MLL4, KIAA0304, DYT28, MRD68	KMT2B	Lysine-specific methyltransferase 2B	606834	Dystonia 28, childhood-onset	617284	AD
KMT2B, MLL4, KIAA0304, DYT28, MRD68	KMT2B	Lysine-specific methyltransferase 2B	606834	Intellectual developmental disorder, autosomal dominant 68	619934	AD
CIC, KIAA0306, MRD45	CIC	Capicua transcriptional repressor	612082	Intellectual developmental disorder, autosomal dominant 45	617600	AD
FKRP, MDC1C, LGMDR9, MDDGA5, MDDGB5, MDDGC5	FKRP	Fukutin-related protein	606596	Muscular dystrophy-dystroglycanopathy (congenital with brain and eye anomalies), type A, 5	613153	AR
FKRP, MDC1C, LGMDR9, MDDGA5, MDDGB5, MDDGC5	FKRP	Fukutin-related protein	606596	Muscular dystrophy-dystroglycanopathy (congenital with or without impaired intellectual development), type B, 5	606612	AR
FKRP, MDC1C, LGMDR9, MDDGA5, MDDGB5, MDDGC5	FKRP	Fukutin-related protein	606596	Muscular dystrophy-dystroglycanopathy (limb-girdle), type C, 5	607155	AR
KPTN, 2E4, MRT41	KPTN	Kaptin	615620	Intellectual developmental disorder, autosomal recessive 41	615637	AR
CNOT3, NOT3, IDDSADF	CNOT3	CCR4-NOT transcription complex, subunit 3	604910	Intellectual developmental disorder with speech delay, autism, and dysmorphic facies	618672	AD
MBOAT7, BB1, LENG4, MRT57	MBOAT7	Membrane bound O-acyltransferase domain containing 7	606048	Intellectual developmental disorder, autosomal recessive 57	617188	AR
NAA20, NAT5, NAT3, MRT73	NAA20	N-alpha-acetyltransferase 20, NatB catalytic subunit	610833	Intellectual developmental disorder, autosomal recessive 73	619717	AR
EPB41L1, MRD11	EPB41L1	Erythrocyte membrane protein band 4.1-like 1	602879	?Intellectual developmental disorder, autosomal dominant 11	614257	AD
RAB5IF, C20orf24, CFSMR2	RAB5IF	RAB5-interacting factor	619960	?Craniofacial dysmorphism, skeletal anomalies, and impaired intellectual development syndrome 2	616994	AR
TAF4, TAF2C1, TAFII130, TAF2C, MRD73	TAF4	TAF4 RNA polymerase II, TATA box-binding protein-associated factor, 135kD	601796	Intellectual developmental disorder, autosomal dominant 73	620450	AD
EEF1A2, DEE33, MRD38	EEF1A2	Eukaryotic translation elongation factor-1, alpha-2	602959	Developmental and epileptic encephalopathy 33	616409	AD
EEF1A2, DEE33, MRD38	EEF1A2	Eukaryotic translation elongation factor-1, alpha-2	602959	Intellectual developmental disorder, autosomal dominant 38	616393	AD
DYRK1A, MNBH, MNB, MRD7	DYRK1A	Dual specificity tyrosine phosphorylation regulated kinase-1A	600855	Intellectual developmental disorder, autosomal dominant 7	614104	AD
LSS, OSC, CTRCT44, HYPT14, APMR4	LSS	Lanosterol synthase	600909	Alopecia-intellectual disability syndrome 4	618840	AR
LSS, OSC, CTRCT44, HYPT14, APMR4	LSS	Lanosterol synthase	600909	Cataract 44	616509	AR
LSS, OSC, CTRCT44, HYPT14, APMR4	LSS	Lanosterol synthase	600909	Hypotrichosis 14	618275	AR
MCM3AP, MAP80, GANP, PNRIID	MCM3AP	Minichromosome maintenance 3-associated protein, 80-kD	603294	Peripheral neuropathy, autosomal recessive, with or without impaired intellectual development	618124	AR
LARGE, KIAA0609, MDC1D, MDDGA6, MDDGB6	LARGE1	Acetylglucosaminyltransferase-like protein	603590	Muscular dystrophy-dystroglycanopathy (congenital with brain and eye anomalies), type A, 6	613154	AR
LARGE, KIAA0609, MDC1D, MDDGA6, MDDGB6	LARGE1	Acetylglucosaminyltransferase-like protein	603590	Muscular dystrophy-dystroglycanopathy (congenital with impaired intellectual development), type B, 6	608840	AR
CACNG2, MRD10	CACNG2	Calcium channel, voltage-dependent, gamma-2 subunit (stargazin)	602911	?Intellectual developmental disorder, autosomal dominant 10	614256	AD
TCF20, SPBP, AR1, DDVIBA	TCF20	Transcription factor 20	603107	Developmental delay with variable intellectual impairment and behavioral abnormalities	618430	AD
NLGN4X, NLGN4, KIAA1260, AUTSX2	NLGN4X	Neuroligin 4, X-linked	300427	{Autism susceptibility, X-linked 2}	300495	XL
NLGN4X, NLGN4, KIAA1260, AUTSX2	NLGN4X	Neuroligin 4, X-linked	300427	Intellectual developmental disorder, X-linked	300495	XL
FRMPD4, PRESO, KIAA0316, XLID104	FRMPD4	FERM and PDZ domains-containing protein 4	300838	Intellectual developmental disorder, X-linked 104	300983	XL
GLRA2, MRXSP	GLRA2	Glycine receptor, alpha-2 polypeptide	305990	Intellectual developmental disorder, X-linked syndromic, Pilorge type	301076	XL
RPS6KA3, RSK2, XLID19	RPS6KA3	Ribosomal protein S6 kinase A3	300075	Coffin-Lowry syndrome	303600	XLD
RPS6KA3, RSK2, XLID19	RPS6KA3	Ribosomal protein S6 kinase A3	300075	Intellectual developmental disorder, X-linked 19	300844	XLD
CNKSR2, CNK2, KIAA0902, MRXSHG	CNKSR2	connector enhancer of KSR 2	300724	Intellectual developmental disorder, X-linked syndromic, Houge type	301008	XL
SMS, SRS, MRXSSR	SMS	Spermine synthase	300105	Intellectual developmental disorder, X-linked syndromic, Snyder-Robinson type	309583	XLR
KLHL15, KIAA1677, XLID103	KLHL15	Kelch-like 15	300980	Intellectual developmental disorder, X-linked 103	300982	XLR
ZFX, MRXS37	ZFX	Zinc finger protein, X-linked	314980	Intellectual developmental disorder, X-linked syndromic 37	301118	XL
ARX, ISSX, PRTS, MRXS1, MRX36, MRX54, MRX43, MRX87, MRX29, MRX32	ARX	Aristaless-related homeobox, X-linked	300382	Developmental and epileptic encephalopathy 1	308350	XLR
ARX, ISSX, PRTS, MRXS1, MRX36, MRX54, MRX43, MRX87, MRX29, MRX32	ARX	Aristaless-related homeobox, X-linked	300382	Hydranencephaly with abnormal genitalia	300215	XL
ARX, ISSX, PRTS, MRXS1, MRX36, MRX54, MRX43, MRX87, MRX29, MRX32	ARX	Aristaless-related homeobox, X-linked	300382	Intellectual developmental disorder, X-linked 29	300419	XLR
ARX, ISSX, PRTS, MRXS1, MRX36, MRX54, MRX43, MRX87, MRX29, MRX32	ARX	Aristaless-related homeobox, X-linked	300382	Lissencephaly, X-linked 2	300215	XL
ARX, ISSX, PRTS, MRXS1, MRX36, MRX54, MRX43, MRX87, MRX29, MRX32	ARX	Aristaless-related homeobox, X-linked	300382	Partington syndrome	309510	XLR
ARX, ISSX, PRTS, MRXS1, MRX36, MRX54, MRX43, MRX87, MRX29, MRX32	ARX	Aristaless-related homeobox, X-linked	300382	Proud syndrome	300004	XL
IL1RAPL1, IL1R8, MRX21, MRX34	IL1RAPL1	Il-1 receptor accessory protein-like 1	300206	Intellectual developmental disorder, X-linked 21	300143	XLR
TSPAN7, TM4SF2, MXS1, A15, XLID58	TSPAN7	Tetraspanin 7	300096	Intellectual developmental disorder, X-linked 58	300210	XLR
ATP6AP2, ATP6M8-9, XMRE, MRXSH, XPDS, CDG2R	ATP6AP2	ATPase, H+ transporting, lysosomal, accessory protein 2	300556	?Parkinsonism with spasticity, X-linked	300911	XLR
ATP6AP2, ATP6M8-9, XMRE, MRXSH, XPDS, CDG2R	ATP6AP2	ATPase, H+ transporting, lysosomal, accessory protein 2	300556	Congenital disorder of glycosylation, type IIr	301045	XLR
ATP6AP2, ATP6M8-9, XMRE, MRXSH, XPDS, CDG2R	ATP6AP2	ATPase, H+ transporting, lysosomal, accessory protein 2	300556	Intellectual developmental disorder, X-linked syndromic, Hedera type	300423	XLR
USP9X, DFFRX, XLID99, MRXS99F	USP9X	Ubiquitin-specific protease-9, X chromosome (Drosophila fat facets related, X-linked)	300072	Intellectual developmental disorder, X-linked 99	300919	XLR
USP9X, DFFRX, XLID99, MRXS99F	USP9X	Ubiquitin-specific protease-9, X chromosome (Drosophila fat facets related, X-linked)	300072	Intellectual developmental disorder, X-linked 99, syndromic, female-restricted	300968	XLD
DDX3X, DDX3, DBX, MRX102, MRXSSB	DDX3X	DEAD-box helicase 3, X-linked	300160	Intellectual developmental disorder, X-linked syndromic, Snijders Blok type	300958	XLD, XLR
CASK, MICPCH, FGS4, CMG, MRXSNA	CASK	Calcium/calmodulin-dependent serine protein kinase	300172	FG syndrome 4	300422	XLR
CASK, MICPCH, FGS4, CMG, MRXSNA	CASK	Calcium/calmodulin-dependent serine protein kinase	300172	Intellectual developmental disorder and microcephaly with pontine and cerebellar hypoplasia	300749	XL
CASK, MICPCH, FGS4, CMG, MRXSNA	CASK	Calcium/calmodulin-dependent serine protein kinase	300172	Intellectual developmental disorder, with or without nystagmus	300422	XLR
SLC9A7, NHE7, MRX108	SLC9A7	Solute carrier family 9 (sodium/hydrogen exchanger), member 7	300368	Intellectual developmental disorder, X-linked 108	301024	XLR
SYN1, EPILX1, MRX50	SYN1	Synapsin I	313440	Epilepsy, X-linked 1, with variable learning disabilities and behavior disorders	300491	XL
SYN1, EPILX1, MRX50	SYN1	Synapsin I	313440	Intellectual developmental disorder, X-linked 50	300115	XL
FTSJ1, JM23, SPB1, MRX44, MRX9, XLID9	FTSJ1	FTSJ RNA 2-prime-O-methyltransferase 1	300499	Intellectual developmental disorder, X-linked 9	309549	XLR
TFE3, RCCX1, MRXSPF	TFE3	Transcription factor for IgH enhancer	314310	Intellectual developmental disorder, X-linked syndromic, with pigmentary mosaicism and coarse facies	301066	XL
TFE3, RCCX1, MRXSPF	TFE3	Transcription factor for IgH enhancer	314310	Renal cell carcinoma, papillary, 1	300854
SYP, XLID96	SYP	Synaptophysin	313475	Intellectual developmental disorder, X-linked 96	300802	XLR
USP27X, USP22L, XLID105	USP27X	Ubiquitin-specific protease 27, X-linked	300975	Intellectual developmental disorder, X-linked 105	300984	XLR
KDM5C, JARID1C, SMCX, DXS1272E, XE169, MRXSCJ	KDM5C	Lysine demethylase 5C	314690	Intellectual developmental disorder, X-linked syndromic, Claes-Jensen type	300534	XLR
IQSEC2, KIAA0522, MRX1, MRX78, XLID1	IQSEC2	IQ motif- and Sec7 domain-containing protein 2	300522	Intellectual developmental disorder, X-linked 1	309530	XLD
HUWE1, UREB1, KIAA0312, LASU1, MRXST	HUWE1	HECT, UBA, and WWE domains-containing protein 1	300697	Intellectual developmental disorder, X-linked syndromic, Turner type	309590	XL
PHF8, ZNF422, KIAA1111, MRXSSD	PHF8	PHD finger protein 8	300560	Intellectual developmental disorder, X-linked syndromic, Siderius type	300263	XLR
FGD1, FGDY, AAS, MRXS16	FGD1	FYVE, RhoGEF, and PH domain-containing protein 1	300546	Aarskog-Scott syndrome	305400	XLR
FGD1, FGDY, AAS, MRXS16	FGD1	FYVE, RhoGEF, and PH domain-containing protein 1	300546	Intellectual developmental disorder, X-linked syndromic 16	305400	XLR
OPHN1, MRXSBL	OPHN1	Oligophrenin-1	300127	Intellectual developmental disorder, X-linked syndromic, Billuart type	300486	XLR
IGBP1, MRXS28	IGBP1	Immunoglobulin-binding protein 1	300139	?Corpus callosum, agenesis of, with impaired intellectual development, ocular coloboma and micrognathia	300472	XLR
KIF4A, KIF4, XLID100, TMDI	KIF4A	Kinesin family member 4A	300521	Intellectual developmental disorder, X-linked 100	300923	XLR
KIF4A, KIF4, XLID100, TMDI	KIF4A	Kinesin family member 4A	300521	Taurodontism, microdontia, and dens invaginatus	313490	XLR
DLG3, NEDLG, SAP102, XLID90	DLG3	Discs large MAGUK scaffold protein 3	300189	Intellectual developmental disorder, X-linked 90	300850	XLR
ZMYM3, ZNF261, DXS6673E, XLID112	ZMYM3	Zinc finger, MYM-type 3	300061	Intellectual developmental disorder, X-linked 112	301111	XLR
NONO, NRB54, MRXS34	NONO	Non-Pou domain-containing octamer (ATGCAAAT) binding protein (nuclear RNA-binding protein, 54-kD)	300084	Intellectual developmental disorder, X-linked syndromic 34	300967	XL
TAF1, TAF2A, CCG1, BA2R, DYT3, MRXS33	TAF1	TATA-box binding protein-associated factor 1	313650	Dystonia-Parkinsonism, X-linked	314250	XLR
TAF1, TAF2A, CCG1, BA2R, DYT3, MRXS33	TAF1	TATA-box binding protein-associated factor 1	313650	Intellectual developmental disorder, X-linked syndromic 33	300966	XLR
OGT, XLID106	OGT	O-linked N-acetylglucosamine transferase	300255	Intellectual developmental disorder, X-linked 106	300997	XLR
NEXMIF, KIAA2022, XLID98	NEXMIF	Neurite extension and migration factor	300524	Intellectual developmental disorder, X-linked 98	300912	XLD
ATRX, XH2, XNP, SHS, SFM1, MRXHF1	ATRX	ATRX chromatin remodeler	300032	Alpha-thalassemia myelodysplasia syndrome, somatic	300448
ATRX, XH2, XNP, SHS, SFM1, MRXHF1	ATRX	ATRX chromatin remodeler	300032	Alpha-thalassemia/impaired intellectual development syndrome	301040	XLD
ATRX, XH2, XNP, SHS, SFM1, MRXHF1	ATRX	ATRX chromatin remodeler	300032	Intellectual disability-hypotonic facies syndrome, X-linked	309580	XLR
BRWD3, MRX93, XLID93	BRWD3	Bromodomain-and WD repeat-containing protein 3	300553	Intellectual developmental disorder, X-linked 93	300659	XLR
ZNF711, ZNF6, CMPX1, XLID97	ZNF711	Zinc finger protein-711	314990	Intellectual developmental disorder, X-linked 97	300803	XL
SRPX2, SRPUL, RESDX	SRPX2	SUSHI repeat-containing protein, X-linked, 2	300642	?Rolandic epilepsy, impaired intellectual development, and speech dyspraxia	300643
CSTF2, CSTF64, XLID113	CSTF2	Cleavage stimulation factor, 3-prime pre-RNA, subunit 2, 64kD	300907	?Intellectual developmental disorder, X-linked 113	301116	XLR
HNRNPH2, NRPH2, MRXSB	HNRNPH2	Heterogeneous nuclear ribonucleoprotein H2	300610	Intellectual developmental disorder, X-linked syndromic, Bain type	300986	XLD
MID2, XLID101	MID2	Midline 2	300204	?Intellectual developmental disorder, X-linked 101	300928	XLR
ACSL4, FACL4, ACS4, XLID63	ACSL4	Acyl-CoA synthetase long-chain family member 4	300157	Intellectual developmental disorder, X-linked 63	300387	XLD
PAK3, MRX30, MRX47, XLID30	PAK3	p21-activated kinase-3	300142	Intellectual developmental disorder, X-linked 30	300558	XLR
STEEP1, CXorf56, XLID107	STEEP1	STING1 ER exit protein 1	301012	?Intellectual developmental disorder, X-linked 107	301013	XL
UBE2A, RAD6A, MRXSN, MRXS30	UBE2A	Ubiquitin-conjugating enzyme E2 A	312180	Intellectual developmental disorder, X-linked syndromic, Nascimento type	300860	XLR
UPF3B, RENT3B, MRXS14	UPF3B	UPF3B regulator of nonsense-mediated mRNA decay	300298	Intellectual developmental disorder, X-linked syndromic 14	300676	XLR
NKAP, MRXSHD	NKAP	NFKB-activating protein	300766	Intellectual developmental disorder, X-linked syndromic, Hackman-Di Donato type	301039	XLR
CUL4B, MRXSC, MRXHF2, SFM2, MRXS15	CUL4B	Cullin-4B	300304	Intellectual developmental disorder, X-linked syndromic, Cabezas type	300354	XLR
GRIA3, GLUR3, MRXSW	GRIA3	Glutamate receptor, ionotropic, AMPA 3	305915	Intellectual developmental disorder, X-linked syndromic, Wu type	300699	XLR
THOC2, THO2, XLID12	THOC2	THO complex 2	300395	Intellectual developmental disorder, X-linked 12	300957	XLR
ZDHHC9, DHHC9, MRXSR	ZDHHC9	Zinc finger DHHC domain-containing protein 9	300646	Intellectual developmental disorder, X-linked syndromic, Raymond type	300799	XL
SLC9A6, NHE6, MRXSCH	SLC9A6	Solute carrier family 9 (sodium/hydrogen exchanger), member 6	300231	Intellectual developmental disorder, X-linked syndromic, Christianson type	300243	XL
RBMX, MRXS11, MRXSH, MRXSG	RBMX	RNA-binding motif protein, X chromosome	300199	?Intellectual developmental disorder, X-linked syndromic, Gustavson type	309555	XLR
RBMX, MRXS11, MRXSH, MRXSG	RBMX	RNA-binding motif protein, X chromosome	300199	?Intellectual developmental disorder, X-linked syndromic, Shashi type	300238	XLR
FGF13, FGF2, DEE90, XLID110	FGF13	Fibroblast growth factor-13	300070	Developmental and epileptic encephalopathy 90	301058	XLD, XLR
FGF13, FGF2, DEE90, XLID110	FGF13	Fibroblast growth factor-13	300070	Intellectual developmental disorder, X-linked 110	301095	XLR
SOX3, MRGH	SOX3	SRY (sex determining region Y)-box 3	313430	Intellectual developmental disorder, X-linked, with isolated growth hormone deficiency	300123
SOX3, MRGH	SOX3	SRY (sex determining region Y)-box 3	313430	Panhypopituitarism, X-linked	312000	XL
SLITRK2, KIAA1854, CXorf1, CXorf2, XLID111	SLITRK2	SLIT- and NTRK-like family, member 2	300561	Intellectual developmental disorder, X-linked 111	301107	XL
AFF2, FMR2, FRAXE, XLID109	AFF2	AF4/FMR2 family, member 2 (fragile site, X-linked, E)	300806	Intellectual developmental disorder, X-linked 109	309548	XLR
GABRA3, EPILX2	GABRA3	Gamma-aminobutyric acid (GABA) A receptor, alpha-3	305660	Epilepsy, X-linked 2, with or without impaired intellectual development and dysmorphic features	301091	XL
MECP2, RTT, PPMX, AUTSX3, MRXSL, MRXS13	MECP2	Methyl-CpG-binding protein-2	300005	{Autism susceptibility, X-linked 3}	300496	XL
MECP2, RTT, PPMX, AUTSX3, MRXSL, MRXS13	MECP2	Methyl-CpG-binding protein-2	300005	Encephalopathy, neonatal severe	300673	XLR
MECP2, RTT, PPMX, AUTSX3, MRXSL, MRXS13	MECP2	Methyl-CpG-binding protein-2	300005	Intellectual developmental disorder, X-linked syndromic 13	300055	XLR
MECP2, RTT, PPMX, AUTSX3, MRXSL, MRXS13	MECP2	Methyl-CpG-binding protein-2	300005	Intellectual developmental disorder, X-linked syndromic, Lubs type	300260	XLR
MECP2, RTT, PPMX, AUTSX3, MRXSL, MRXS13	MECP2	Methyl-CpG-binding protein-2	300005	Rett syndrome	312750	XLD
MECP2, RTT, PPMX, AUTSX3, MRXSL, MRXS13	MECP2	Methyl-CpG-binding protein-2	300005	Rett syndrome, atypical	312750	XLD
MECP2, RTT, PPMX, AUTSX3, MRXSL, MRXS13	MECP2	Methyl-CpG-binding protein-2	300005	Rett syndrome, preserved speech variant	312750	XLD
RPL10, DXS648, QM, AUTSX5, MRXS35	RPL10	Ribosomal protein L10	312173	{Autism, susceptibility to, X-linked 5}	300847
RPL10, DXS648, QM, AUTSX5, MRXS35	RPL10	Ribosomal protein L10	312173	Intellectual developmental disorder, X-linked syndromic 35	300998	XLR
GDI1, RABGD1A, MRX41, MRX48, XLID41	GDI1	GDP dissociation inhibitor 1	300104	Intellectual developmental disorder, X-linked 41	300849	XLD
FAM50A, DXS9928E, HXC26, MRXSA	FAM50A	Family with sequence similarity 50, member A	300453	Intellectual developmental disorder, X-linked syndromic, Armfield type	300261	XLR
RAB39B, XLID72, WSMN, MRX72	RAB39B	RAB39B, member Ras oncogene family	300774	Intellectual developmental disorder, X-linked 72	300271	XLR
RAB39B, XLID72, WSMN, MRX72	RAB39B	RAB39B, member Ras oncogene family	300774	Waisman syndrome	311510	XLR
Inheritance Abbreviations
AD	Autosomal dominant
AR	Autosomal recessive
XL	X-linked
XLD	X-linked dominant
XLR	X-linked recessive

## Sheet: Sheet2
Variations associated with intellectual disability in sheet1 were identified in three independent families.
	HGNC	Gene/Locus MIM number	Inheritance	Variant conditions, Proband	Variant conditions, Father	Variant conditions, Mother	chromosome	Initial position	Terminal position	MANE SELECT	Nucleic acid variation	Protein variation	ACMG criteria	rsID	MAF (Chigene)	MAF (dbSNP)	Highest EXAC Allele Population Frequency	GnomAD Allele Population Frequency (East Asian)	Mutation Probability, Proband	Mutation Probability, Father	Mutation Probability, Mother
Famliy 1	KMT2B	OMIM:617284	AD,ADIP	heterozygote	heterozygote	wild type	chr19	36228779	36228779	NM_014727	c.7678(exon35)C>T	p.L2560=(p.Leu2560=)	Uncertain significance	rs143873680	0.0003	0.0004	0.0012	0.0004	0.56 =62/110	0.48 =39/82	0.00 =0/97
	KMT2B	OMIM:619934	AD	heterozygote	heterozygote	wild type	chr19	36228779	36228779	NM_014727	c.7678(exon35)C>T	p.L2560=(p.Leu2560=)	Uncertain significance	rs143873680	0.0003	0.0004	0.0012	0.0004	0.56 =62/110	0.48 =39/82	0.00 =0/97
	HERC2	OMIM:615516	AR	heterozygote	heterozygote	wild type	chr15	28517492	28517492	NM_004667	c.952(exon9)G>T	p.D318Y(p.Asp318Tyr)	Uncertain significance	rs77399744	0.00016		0.062		0.21 =58/282	0.15 =25/170	0.00 =0/176
	HERC2	OMIM:227220	AR	heterozygote	heterozygote	wild type	chr15	28517492	28517492	NM_004667	c.952(exon9)G>T	p.D318Y(p.Asp318Tyr)	Uncertain significance	rs77399744	0.00016		0.062		0.21 =58/282	0.15 =25/170	0.00 =0/176
Famliy 2	KIDINS220	OMIM:617296	AD	heterozygote	wild type	heterozygote	chr2	8953480	8953480	NM_020738	c.307-15A>G		Uncertain significance	rs186340508	0.002	0.0002	0.0027	0.0026	0.47 =77/164	0.00 =0/148	0.49 =67/136
	TRIO	OMIM:617061	AD	heterozygote	wild type	heterozygote	chr5	14488073	14488073	NM_007118	c.7336C>T	p.L2446F(p.Leu2446Phe)	Uncertain significance	rs759324474	0.00035				0.43 =10/23	0.00 =0/34	0.61 =23/38
	ATP8A2	OMIM:615268	AR	heterozygote	heterozygote	wild type	chr13	25946400	25946400	NM_016529	c.50G>T	p.R17L(p.Arg17Leu)	Uncertain significance		3.4e-05				0.55 =32/58	0.47 =52/110	0.00 =0/108
	TAF1	OMIM:300966	XR	heterozygote	wild type	heterozygote	chrX	70680544	70680544	NM_004606	c.5350C>T	p.R1784C(p.Arg1784Cys)	Uncertain significance	rs776093280	0.003	0.00079	0.002	0.002	0.51 =77/151	0.00 =0/95	0.52 =70/135
	ABCA2	OMIM:618808	AR	heterozygote	wild type	heterozygote	chr9	139904313	139904313	NM_001606	c.6538G>A	p.A2180T(p.Ala2180Thr)	Uncertain significance	rs374618311	0.00053		0.0004	0.0006	0.47 =42/90	0.00 =0/79	0.53 =44/83
	TAF1	OMIM:314250	XR	heterozygote	wild type	heterozygote	chrX	70680544	70680544	NM_004606	c.5350C>T	p.R1784C(p.Arg1784Cys)	Uncertain significance	rs776093280	0.003	0.00079	0.002	0.002	0.51 =77/151	0.00 =0/95	0.52 =70/135
	ABCA2	OMIM:618808	AR	heterozygote	heterozygote	wild type	chr9	139904394	139904394	NM_001606	c.6496-39delG		Uncertain significance						0.55 =39/71	0.48 =44/91	0.00 =0/86
	SLC45A1	OMIM:617532	AR	heterozygote	heterozygote	wild type	chr1	8403890	8403890	NM_001080397	c.2064G>A	p.Q688Q(p.Gln688=)	Uncertain significance						0.52 =30/58	0.46 =44/96	0.00 =0/82
	FRMPD4	OMIM:300983	XR	heterozygote	wild type	heterozygote	chrX	12736695	12736695	NM_014728	c.3750C>T	p.D1250D(p.Asp1250=)	Uncertain significance	rs372495150	0.00015		0.0001	0.001	0.53 =48/90	0.01 =1/68	0.43 =50/116
	TRIO	OMIM:618825	AD	heterozygote	wild type	heterozygote	chr5	14488073	14488073	NM_007118	c.7336C>T	p.L2446F(p.Leu2446Phe)	Uncertain significance	rs759324474	0.00035				0.43 =10/23	0.00 =0/34	0.61 =23/38
	ABCA2	OMIM:618808	AR	heterozygote	wild type	heterozygote	chr9	139916374	139916374	NM_001606	c.647G>A	p.R216H(p.Arg216His)	Uncertain significance	rs200711069	0.001	0.0006	0.0028	0.0026	0.35 =12/34	0.00 =0/56	0.54 =25/46
	ZMYND11	OMIM:616083	AD	heterozygote	wild type	heterozygote	chr10	226083	226083	NM_006624	c.116+15A>G		Uncertain significance	rs568944197	0.002	0.0002	0.0009	0.0013	0.44 =43/97	0.00 =0/128	0.49 =41/84
Famliy 3	EPB41L1	OMIM:614257	AD	heterozygote	heterozygote	wild type	chr20	34770300	34770300	NM_001258329	c.566+31C>G		Uncertain significance	rs200837660	0.003	0.0004	0.0017	0.0019	0.48 =32/66	0.48 =24/50	0.00 =0/57
	SMARCA2	OMIM:601358	AD	heterozygote	wild type	heterozygote	chr9	2087035	2087035	NM_003070	c.2733A>G	p.Q911Q(p.Gln911=)	Uncertain significance	rs146829604	8.7e-05	0.0042	0.014		0.46 =67/145	0.00 =0/137	0.39 =44/113
	CEP104	OMIM:616781	AR	heterozygote	wild type	heterozygote	chr1	3768884	3768884	NM_014704	c.88A>G	p.T30A(p.Thr30Ala)	Uncertain significance	rs767923089	0.00046		0.0013		0.54 =44/81	0.00 =0/68	0.40 =19/47
	SETD1B	OMIM:619000	AD	heterozygote	wild type	heterozygote	chr12	122248354	122248354	NM_001353345	c.1503G>T	p.S501S(p.Ser501=)	Uncertain significance	rs962039246	1.7e-05				0.44 =46/104	0.00 =0/121	0.52 =32/62
	BRPF1	OMIM:617333	AD	heterozygote	heterozygote	wild type	chr3	9787508	9787508	NM_001003694	c.3218G>A	p.S1073N(p.Ser1073Asn)	Uncertain significance	rs199508235	0.00068	0.0002	0.0007		0.54 =58/107	0.47 =79/167	0.00 =0/111
	TFE3	OMIM:300854	Smu	hemizygote	wild type	heterozygote	chrX	48887558	48887558	NM_006521	c.*111C>T		Uncertain significance	rs782006875	0.00057		0.001		1.00 =10/10	0.00 =0/19	0.53 =8/15
	FOXP1	OMIM:613670	AD	heterozygote	wild type	heterozygote	chr3	71019934	71019934	NM_001349338	c.1675A>G	p.M559V(p.Met559Val)	Uncertain significance	rs764023352	0.00047		0.0008		0.51 =91/179	0.00 =0/142	0.51 =76/149
	TRMT1	OMIM:618302	AR	heterozygote	wild type	heterozygote	chr19	13223743	13223743	NM_017722	c.724C>T	p.L242L(p.Leu242=)	Uncertain significance	rs754750596	0.003		0.0015	0.0006	0.46 =47/103	0.00 =0/87	0.48 =25/52
	HNMT	OMIM:616739	AR	heterozygote	heterozygote	wild type	chr2	138759711	138759711	NM_006895	c.376A>G	p.R126G(p.Arg126Gly)	Uncertain significance		1.6e-05				0.54 =158/293	0.50 =118/234	0.00 =0/207
	HNMT	OMIM:600807	AD,Mu	heterozygote	heterozygote	wild type	chr2	138759711	138759711	NM_006895	c.376A>G	p.R126G(p.Arg126Gly)	Uncertain significance		1.6e-05				0.54 =158/293	0.50 =118/234	0.00 =0/207
	FBXO11	OMIM:618089	AD	heterozygote	heterozygote	wild type	chr2	48132726	48132740	NM_001190274	c.120_134delGCCCCAGCAGCAGCC	p.P40_P45delinsP(p.Pro40_Pro45delinsPro)	Uncertain significance	rs747252806	0.009		0.0062	0.012	0.34 =15/44	0.42 =10/24	0.00 =0/43
Inheritance Abbreviations
AD	Autosomal dominant
AR	Autosomal recessive
Mu	Multifactorial
SMu	Somatic mutation
XR	X-linked recessive
ADIP	Autosomal dominant incomplete dominance
